# Supplementary material for: Development and validation of a prognostic nomogram for predicting overall survival in patients with large retroperitoneal liposarcoma: a population-based cohort study
Source: Research Square preprint supplement (doi:10.21203/rs.3.rs-5821949/v1), 2025-01-15
Supplement: Supplementary file 1 [file 6ddb0cc55e8f1639a1b7d2bc.docx]

**Table S1.** Comparison of clinical pathological features between validation cohort and training cohort.

| Characteristics | Training cohort | Validation cohort | P value |
| --- | --- | --- | --- |
| N | 779 | 334 |  |
| Age, median (IQR) | 62 (53, 71) | 63 (54, 71) | 0.825 |
| Size, median (IQR, mm) | 250 (200, 310) | 240 (190, 300) | 0.076 |
| Sex, n (%) |  |  | 0.113 |
| female | 362 (46.5%) | 138 (41.3%) |  |
| male | 417 (53.5%) | 196 (58.7%) |  |
| Income, n (%) |  |  | 0.083 |
| high | 350 (44.9%) | 155 (46.4%) |  |
| middle | 277 (35.6%) | 132 (39.5%) |  |
| low | 152 (19.5%) | 47 (14.1%) |  |
| City, n (%) |  |  | 0.095 |
| metropolitan | 690 (88.6%) | 307 (91.9%) |  |
| nonmetropolitan | 89 (11.4%) | 27 (8.1%) |  |
| TNM, n (%) |  |  | 0.923 |
| III | 259 (33.2%) | 115 (34.4%) |  |
| II | 46 (5.9%) | 22 (6.6%) |  |
| I | 422 (54.2%) | 174 (52.1%) |  |
| IV | 52 (6.7%) | 23 (6.9%) |  |
| Chemo/Radio, n (%) |  |  | 0.235 |
| no/unknown | 515 (66.1%) | 233 (69.8%) |  |
| yes | 264 (33.9%) | 101 (30.2%) |  |
| Ocurrence pattern, n (%) |  |  | 0.285 |
| non_local | 409 (52.5%) | 187 (56%) |  |
| local | 370 (47.5%) | 147 (44%) |  |
| Ocurrence sequence, n (%) |  |  | 0.935 |
| recurrence | 143 (18.4%) | 62 (18.6%) |  |
| primary | 636 (81.6%) | 272 (81.4%) |  |
| Tumors, n (%) |  |  | 0.417 |
| single | 756 (97%) | 321 (96.1%) |  |
| mutifocal | 23 (3%) | 13 (3.9%) |  |
| Histology, n (%) |  |  | 0.606 |
| DDL | 403 (51.7%) | 183 (54.8%) |  |
| WDL | 315 (40.4%) | 130 (38.9%) |  |
| MLS | 41 (5.3%) | 16 (4.8%) |  |
| PLS | 20 (2.6%) | 5 (1.5%) |  |
| Surgery, n (%) |  |  | 0.804 |
| Total surgical | 460 (59.1%) | 200 (59.9%) |  |
| partial surgical | 269 (34.5%) | 116 (34.7%) |  |
| N0 surgery | 50 (6.4%) | 18 (5.4%) |  |

Abbreviations: TNM, tumor-node-metastasis; WDL, well-differentiated liposarcoma; PLS, pleomorphic liposarcoma; MLS, myxoid liposarcoma; DDL, dedifferentiated liposarcoma.
